# Supplementary material
Source: ML conference proceedings conference paper supplement (https://proceedings.neurips.cc/paper_files/paper/2023/hash/6ec2be0bb10be9a0e5db4cc2a921f301-Abstract.html)
Supplement: Supplementary file 1 [file 6ec2be0bb10be9a0e5db4cc2a921f301-Supplemental-Conference.zip]

Archive with 2 entries (2 files):
- supplement.pdf
- __MACOSX/._supplement.pdf
